# Supplementary material for: Genetically determined thymic function affects strength and duration of immune response in COVID patients with pneumonia
Source: PubMed Central journal article supplement — Sci Adv. 2023 Sep 22;9(38):eadh7969. doi: 10.1126/sciadv.adh7969 (PMC10516486; doi:10.1126/sciadv.adh7969), 2023-09-22
Supplement: sciadv.adh7969_sm.pdf [file sciadv.adh7969_sm.pdf]

Supplementary Materials for  
**Genetically-determined thymic function affects strength and duration of  
immune response in COVID patients with pneumonia**

Hélène Roux *et al.*

Corresponding author: Stefano Marullo, [stefano.marullo@inserm.fr](mailto:stefano.marullo@inserm.fr)

*Sci. Adv.* **9**, eadh7969 (2023)  
DOI: 10.1126/sciadv.adh7969

**This PDF file includes:**

Table S1  
Figs. S1 to S7

**Supplemental Table 1: Multivariate analysis with hypertension, BMI, diabetes, cancer, BPCO, renal failure as co-variables**

|               | <b>OR (multivariate analysis)</b> |
|---------------|-----------------------------------|
| HTA           | 1.01 (0.14-7.22; p=0.992)         |
| BMI           | 0.97 (0.84-1.12; p=0.701)         |
| <b>SNP GG</b> | <b>0.12 (0.01-0.75; p=0.034)</b>  |
| Diabetes      | 0.27 (0.002-2.88; p=0.260)        |
| Cancer        | 0.65 (0.04-17.88; p=0.763)        |
| COPD          | 4649686 (0.00-NA; p=0.995)        |
| Renal Failure | 7103511 (0.00-NA; 0.995)          |

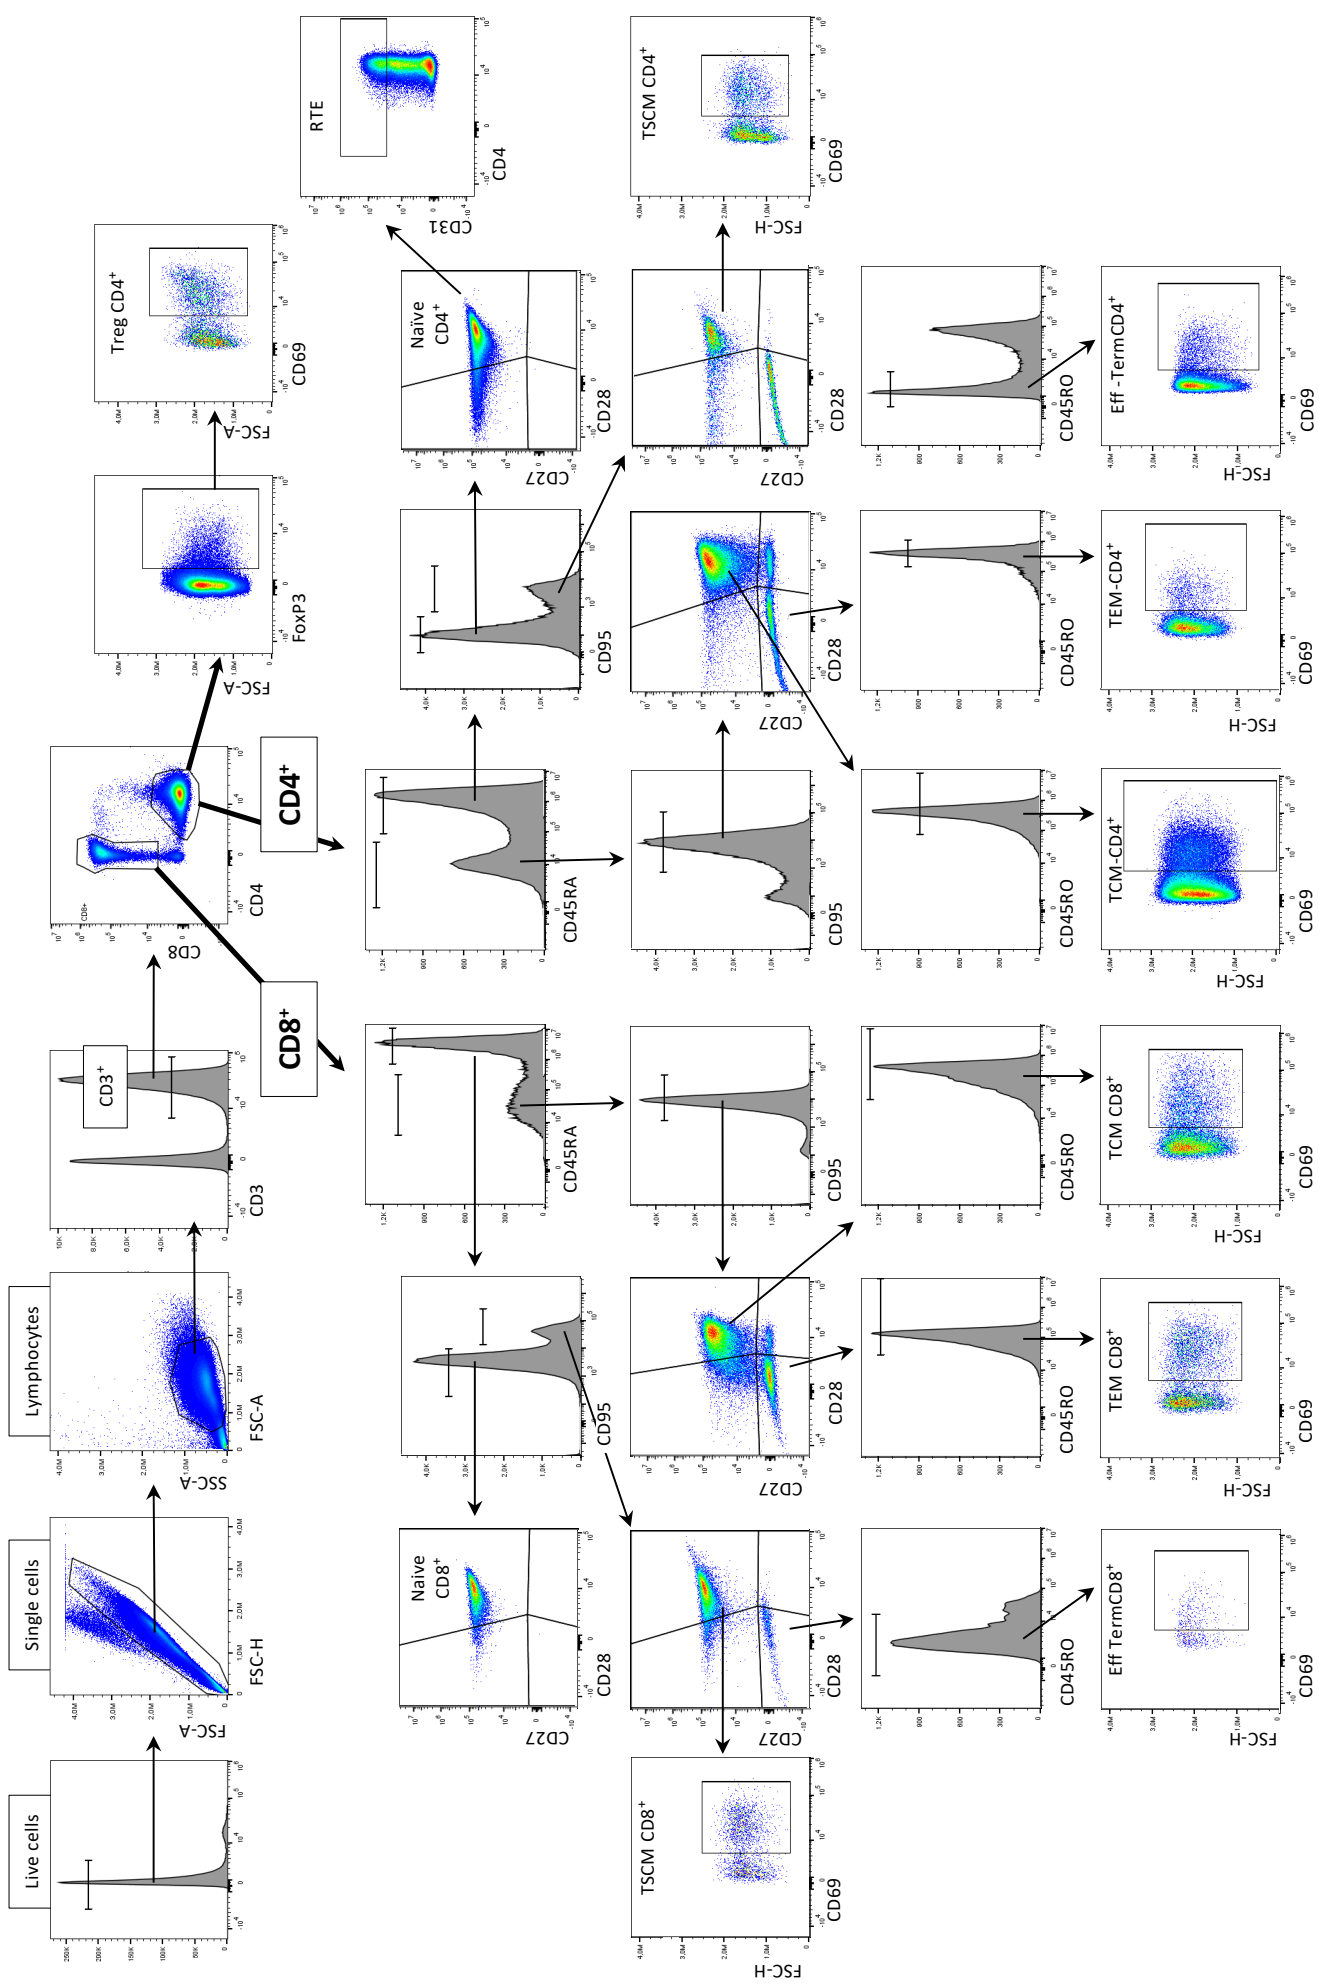

Supplemental Figure 1: Gating strategy for T-cell subsets

## Acute Phase

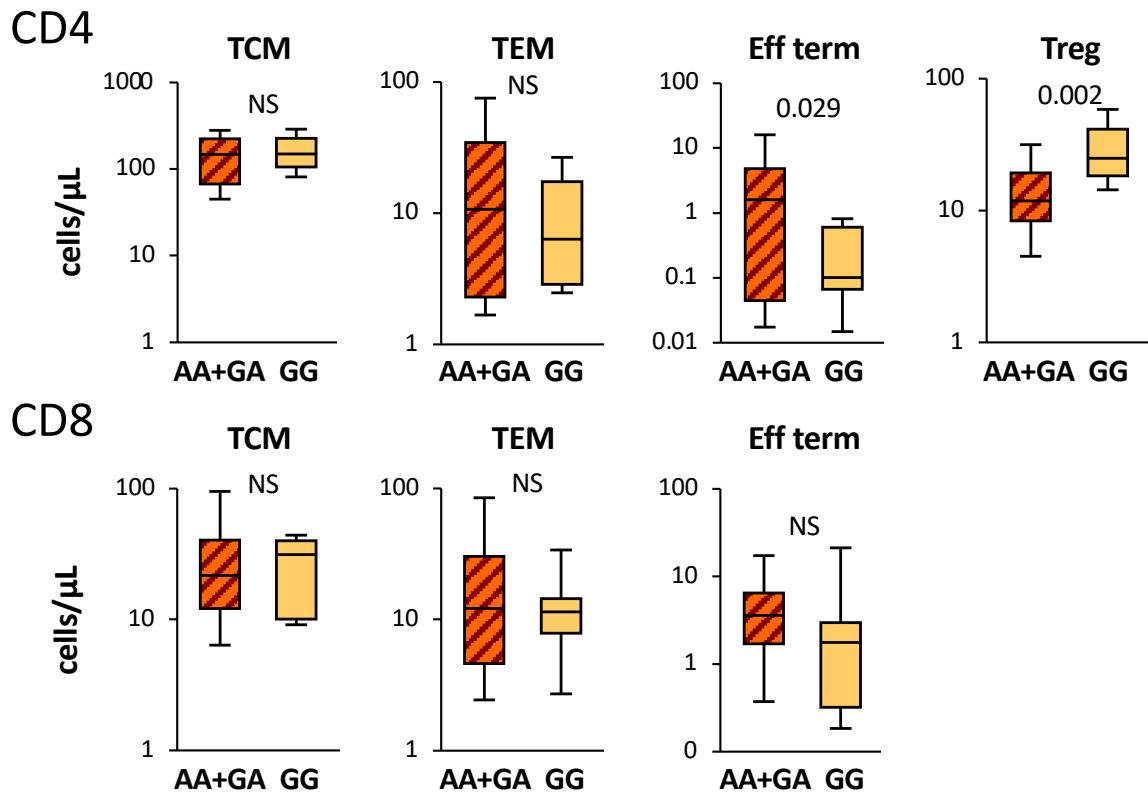

## Recovery Phase

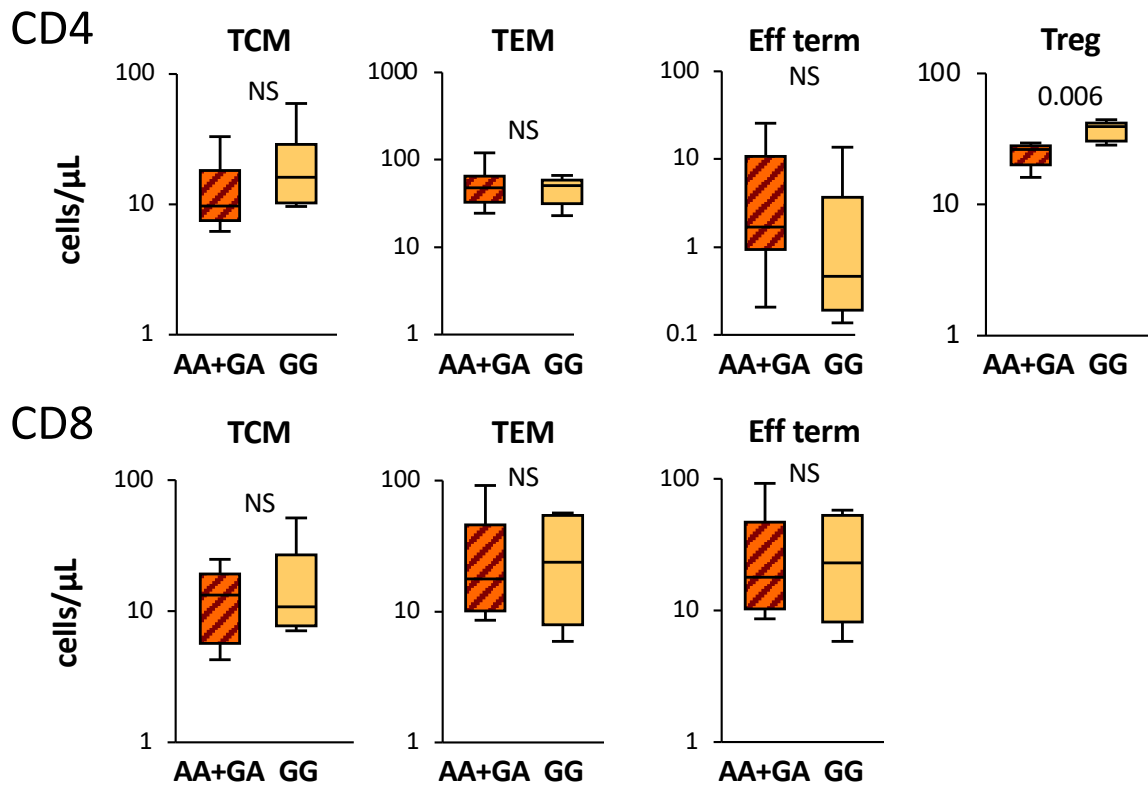

### Supplemental Figure 2. Memory T-cell subsets in COVID-19 patients

COVID-19 patients were classified according to their genotype at the rs2204985 locus (n=4 AA, n=9 GA and n=10 GG). Central Memory (TCM), Effector Memory (TEM), Terminal Effector memory (Eff term) CD4<sup>+</sup> and CD8<sup>+</sup> as well as regulatory CD4<sup>+</sup> T-cells (Treg) were quantified by FACS in PBMCs from both groups of COVID-19 patients (AA+GA and GG genotypes) during the acute phase and 6 months after recovery. Statistical significance of the differences between groups is shown (Mann-Whitney Test). Patients with AA and GA genotypes were analyzed together.

## Recovery Phase

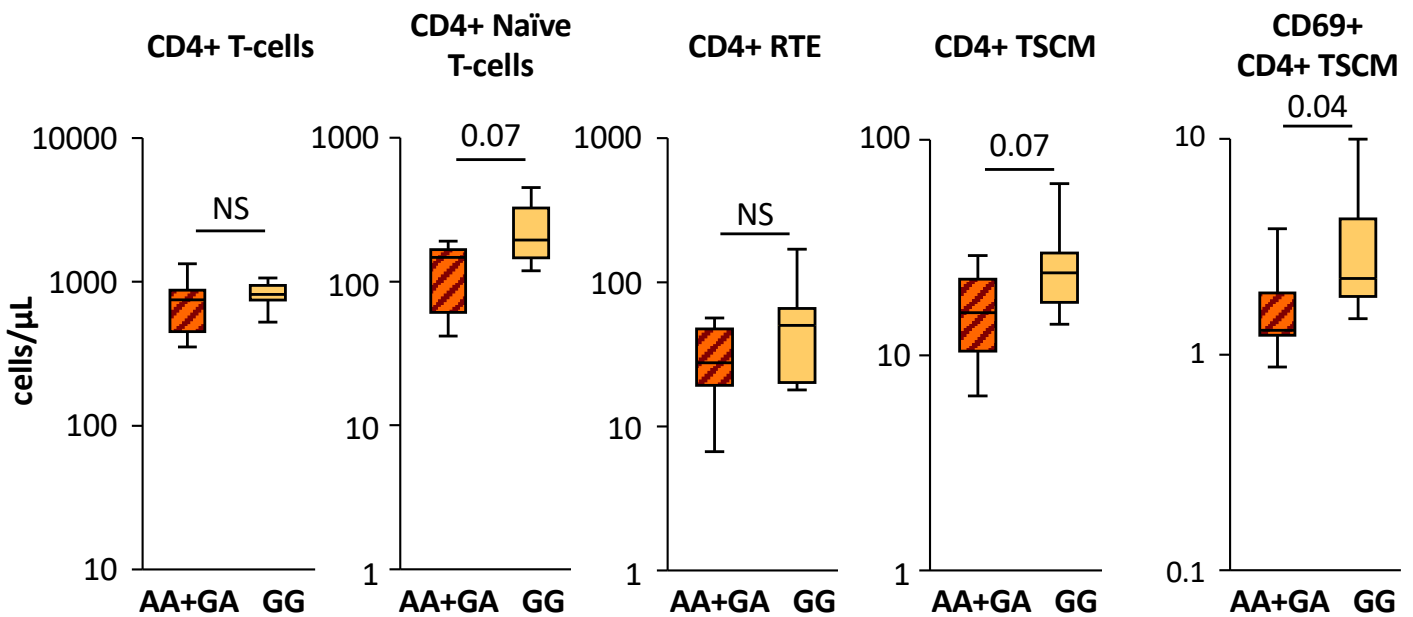

### Supplemental Figure 3. CD4<sup>+</sup> T-cell subsets in COVID-19 patients after recovery

COVID-19 patients were classified according to their genotype at the rs2204985 locus (n=4 AA, n=9 GA and n=10 GG). CD4<sup>+</sup> T-cells, CD4<sup>+</sup> naïve T-cells, CD4<sup>+</sup> RTEs, CD4<sup>+</sup> TSCM and activated (CD69<sup>+</sup>) CD4<sup>+</sup> TSCM were quantified by FACS in PBMCs from both groups of COVID-19 patients (AA+GA and GG genotypes) 6 months after recovery. Statistical significance of the differences between groups is shown (Mann-Whitney Test). Patients with AA and GA genotypes were analyzed together.

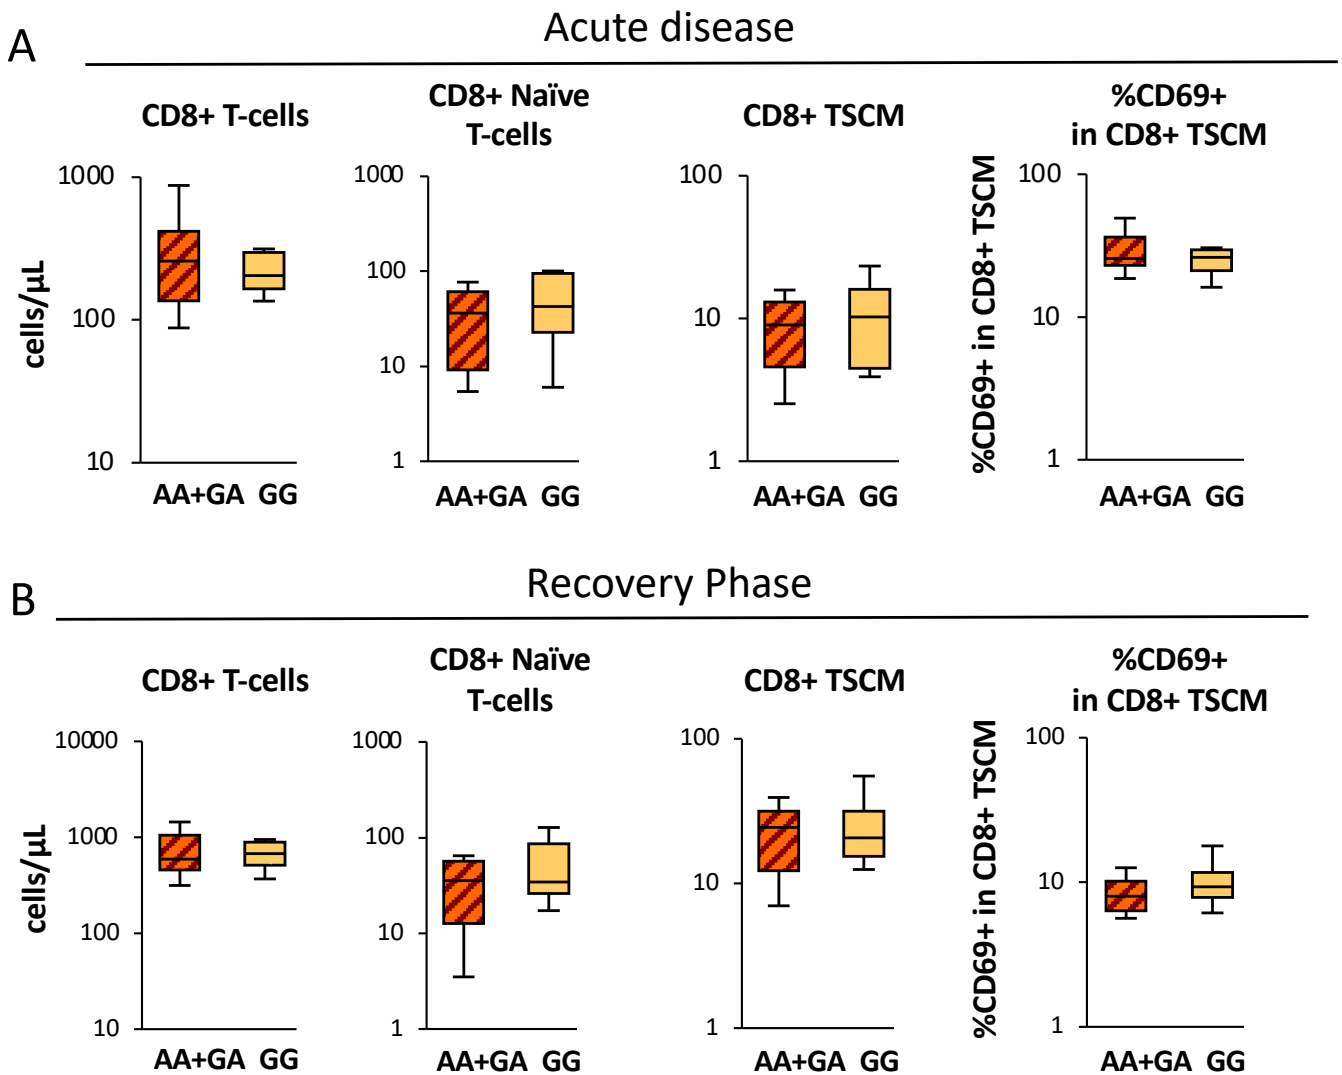

**Supplemental Figure 4. CD8<sup>+</sup> T-cell subsets in COVID-19 patients**

COVID-19 patients were classified according to their genotype locus. CD8<sup>+</sup> T-cells, CD8<sup>+</sup> naïve T-cells, CD8<sup>+</sup> TSCM and activated (CD69<sup>+</sup>) CD8<sup>+</sup> TSCM were quantified by FACS in PBMCs from both groups of COVID-19 patients (AA+GA and GG genotypes) sampled during the acute phase of the disease (A; n=8 AA, n=20 GA and n=12 GG) and 6 months after recovery (B; n=4 AA, n=9 GA and n=10 GG). No statistical significance was observed between groups (Mann-Whitney Test). Patients with AA and GA genotypes were analyzed together.

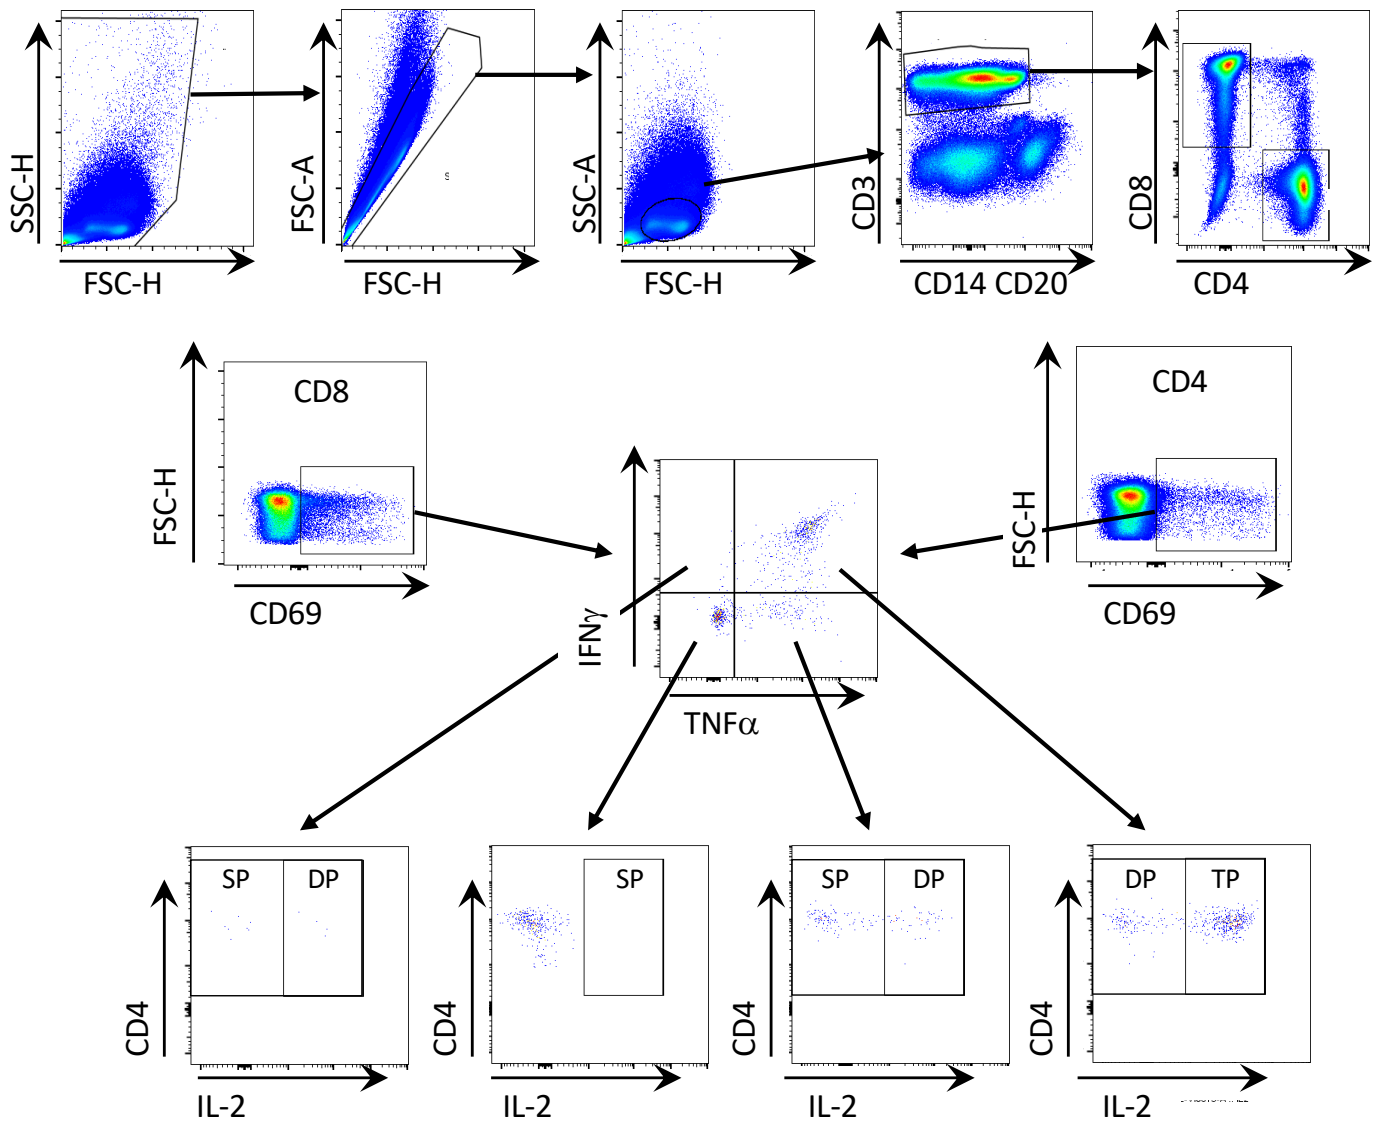

**Supplemental Figure 5. Gating strategy for anti-SARS-CoV-2-specific T-cell responses.**

PBMCs from COVID patients were stimulated (or not) *in vitro* with selected SARS-CoV-2 peptides for 6 hours, in the presence of brefeldin A during the last 4 hours. Intracellular cytokine expression by CD69<sup>+</sup>CD4<sup>+</sup> and CD69<sup>+</sup>CD8<sup>+</sup> T-cells was analyzed by FACS using IFN $\gamma$ -, IL-2- and TNF $\alpha$ -specific antibodies. SP: Simple positive, DP: Double positive; TP: Triple positive.

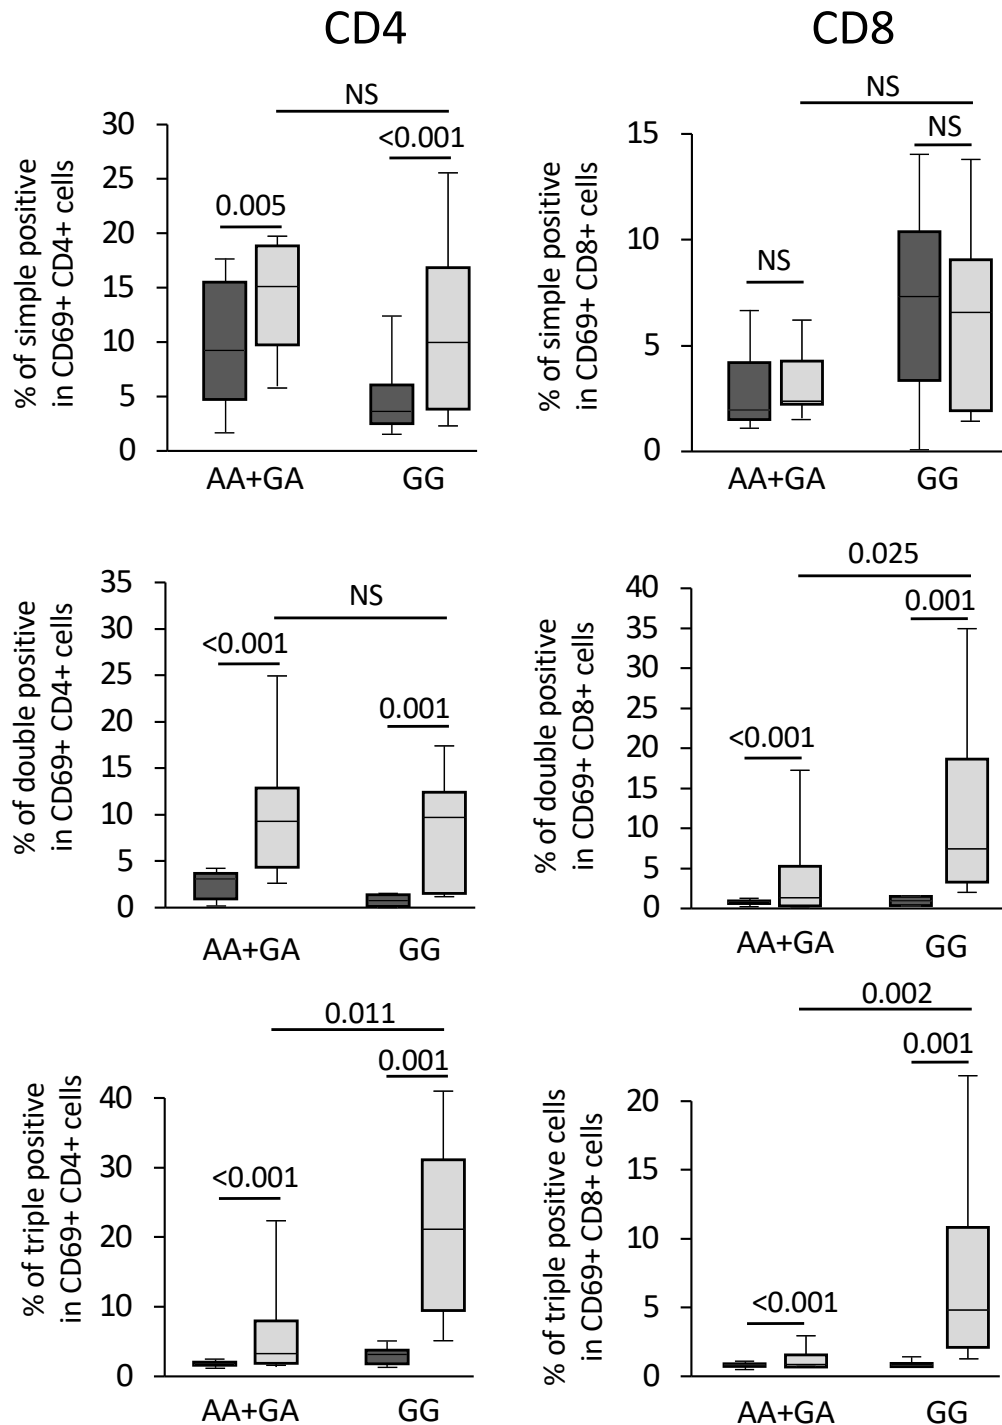

**Supplemental Figure 6. Comprehensive analysis of SARS-CoV-2-specific T-cell responses at recovery.**

PBMCs collected 6 months after recovery were stimulated *in vitro* by a selected pool of SARS-CoV-2 peptides. The frequency of cells expressing 1 cytokine (IFN $\alpha$ , TNF $\alpha$  or IL-2; top panels), any combination of 2 cytokines (middle panels) or all 3 cytokines (bottom panels), without (dark grey) or after (light grey bars) *in vitro* stimulation with SARS-CoV-2 peptides is shown for CD69<sup>+</sup>CD4<sup>+</sup> (left panels) and CD69<sup>+</sup>CD8<sup>+</sup> (right panels) T-cells. Statistical significance of the differences between peptide stimulated and non-stimulated conditions, and between the 2 groups of patients are shown (Mann-Whitney Test).



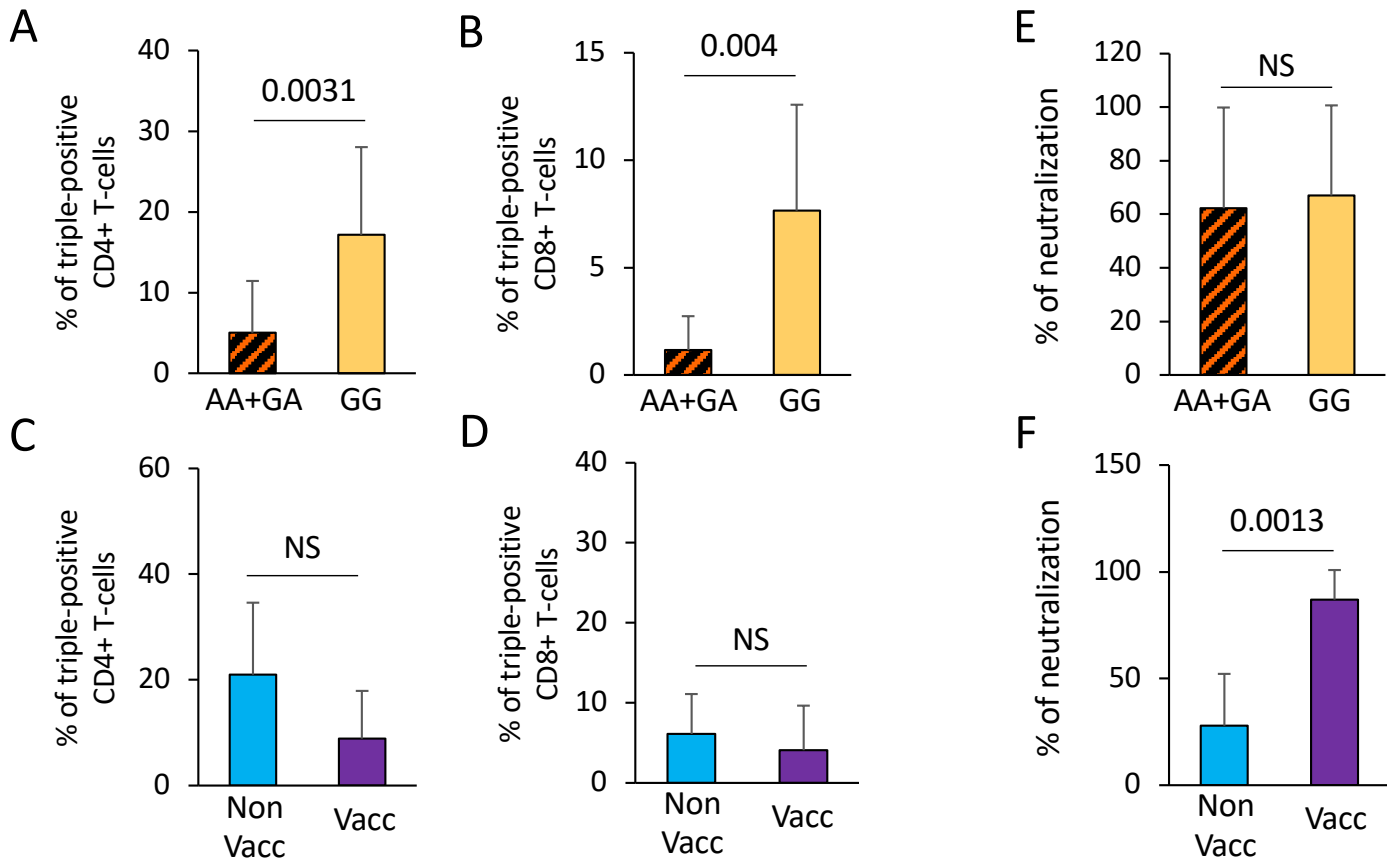

**Supplemental Figure 7. Impact of vaccination and genotype on SARS-CoV-2 specific neutralizing antibody and T-cell responses.**

Plasma samples and PBMCs were collected 6 months after recovery. PBMCs were stimulated *in vitro* by a selected pool of SARS-CoV-2 peptides. The frequency of triple-positive cells among CD69<sup>+</sup>CD4<sup>+</sup> (A and C) or CD69<sup>+</sup>CD8<sup>+</sup> (B and D) T-cells are shown for AA+GA and GG patients (A, B) and compared to that determined in non-vaccinated and vaccinated patients (C, D). Neutralizing activity was not different in plasma samples of AA+GA and GG patients (E), but was significantly enhanced by vaccination (F). Statistical significances of the differences between groups of patients are shown (Mann-Whitney Test).
